# Supplementary material for: Aqueous phase reforming of glycerol over Re-promoted Pt and Rh catalysts
Source: Royal Society of Chemistry journal article supplement (doi:10.1039/c3gc42046a), 2013-12-05
Supplement: c3gc42046a.pdf [file c3gc42046a.pdf]

Supporting Information to

Aqueous phase reforming of glycerol over Re-promoted Pt and Rh catalysts

Aysegul Ciftci, D.A.J. Michel Ligthart and Emiel J.M. Hensen

Schuit Institute of Catalysis, Eindhoven University of Technology,

P.O. Box 513, 5600 MB Eindhoven, The Netherlands

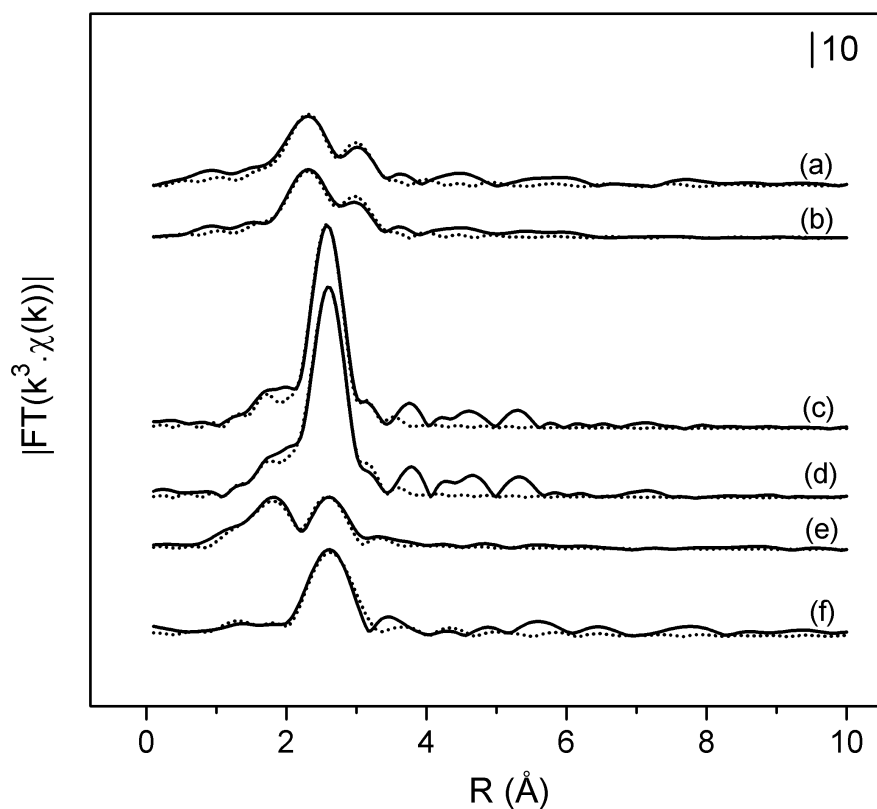

Figure S1 – FT EXAFS functions obtained from the  $k^3$ -weighted Pt  $L_{III}$  edge EXAFS oscillations of Pt/C (a), and PtRe/C (b) during WGS at 300 °C; FT EXAFS functions obtained from the  $k^3$ -weighted Rh K edge EXAFS oscillations of Rh/C (c), and RhRe/C (d) during WGS at 300 °C; FT EXAFS functions obtained from the  $k^3$ -weighted Re  $L_{III}$  edge EXAFS oscillations of RhRe/C (e), and PtRe/C (f) during WGS at 300 °C. Dotted lines represent the fitted spectra.

Table S1 – Product selectivities in APR of glycerol for Pt/C, PtRe/C, Rh/C, RhRe/C and Re/C catalysts after 20 min of reaction.

|        | Conversion | CO <sub>2</sub> | CH <sub>4</sub> | C <sub>2</sub> H <sub>6</sub> | C <sub>3</sub> H <sub>8</sub> | 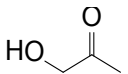 |  |  | Alcohols <sup>1</sup> | Acids <sup>2</sup> | others <sup>3</sup> |
|--------|------------|-----------------|-----------------|-------------------------------|-------------------------------|------------------------------------------------------------------------------------|-------------------------------------------------------------------------------------|-------------------------------------------------------------------------------------|-----------------------|--------------------|---------------------|
| Pt/C   | 0.3        | 7.9             | -               | -                             | -                             | 92.1                                                                               | -                                                                                   | -                                                                                   | -                     | -                  | -                   |
| PtRe/C | 0.3        | 19.4            | -               | 3.1                           | -                             | 55.8                                                                               | 11.3                                                                                | -                                                                                   | 5.9                   | 4.6                | -                   |
| Rh/C   | 0.4        | 62.5            | 3.6             | 7.2                           | 3.3                           | 18.5                                                                               | 1.1                                                                                 | 1.1                                                                                 | 0.9                   | -                  | 1.9                 |
| RhRe/C | 0.4        | 19.0            | 2.4             | -                             | -                             | 63.0                                                                               | 4.3                                                                                 | 2.5                                                                                 | 0.9                   | 2.4                | 5.5                 |
| Re/C   | 0.1        | 13.2            | -               | -                             | -                             | 86.7                                                                               | -                                                                                   | -                                                                                   | -                     | -                  | 0.1                 |

<sup>1</sup>alcohols: methanol, ethanol, 1-propanol, 2-propanol

<sup>2</sup>acids: acetic acid, propanoic acid

<sup>3</sup>others: CO, propionaldehyde, 1,3-propanediol

Table S2 – Product selectivities in APR of glycerol for Pt/C, PtRe/C, Rh/C, RhRe/C and Re/C catalysts after 80 min of reaction.

|        | Conversion | CO <sub>2</sub> | CH <sub>4</sub> | C <sub>2</sub> H <sub>6</sub> | C <sub>3</sub> H <sub>8</sub> | 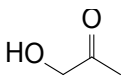 |  |  | Alcohols <sup>1</sup> | Acids <sup>2</sup> | others <sup>3</sup> |
|--------|------------|-----------------|-----------------|-------------------------------|-------------------------------|------------------------------------------------------------------------------------|-------------------------------------------------------------------------------------|-------------------------------------------------------------------------------------|-----------------------|--------------------|---------------------|
| Pt/C   | 1.7        | 33.6            | 3.8             | 2.0                           | 0.4                           | 42.1                                                                               | 14.1                                                                                | 3.9                                                                                 | -                     | -                  | 0.1                 |
| PtRe/C | 2.7        | 39.9            | 3.9             | 5.7                           | 3.3                           | 16.8                                                                               | 24.2                                                                                | 3.5                                                                                 | 1.9                   | 0.8                | -                   |
| Rh/C   | 0.7        | 43.2            | 6.2             | 3.4                           | 0.7                           | 36.5                                                                               | 3.0                                                                                 | 1.0                                                                                 | -                     | 0.8                | 5.2                 |
| RhRe/C | 3.8        | 31.0            | 3.8             | 5.8                           | 2.3                           | 26.3                                                                               | 23.6                                                                                | 3.6                                                                                 | 0.9                   | 0.7                | 2.0                 |
| Re/C   | 0.2        | 11.6            | -               | -                             | -                             | 88.2                                                                               | -                                                                                   | -                                                                                   | -                     | -                  | 0.2                 |

<sup>1</sup>alcohols: methanol, ethanol, 1-propanol, 2-propanol

<sup>2</sup>acids: acetic acid, propanoic acid

<sup>3</sup>others: CO, propionaldehyde, 1,3-propanediol

Table S3– Product selectivities in APR of glycerol for Pt/C, PtRe/C, Rh/C, RhRe/C and Re/C catalysts after 140 min of reaction.

|        | Conversion | CO <sub>2</sub> | CH <sub>4</sub> | C <sub>2</sub> H <sub>6</sub> | C <sub>3</sub> H <sub>8</sub> | 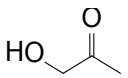 |  |  | Alcohols <sup>1</sup> | Acids <sup>2</sup> | others <sup>3</sup> |
|--------|------------|-----------------|-----------------|-------------------------------|-------------------------------|------------------------------------------------------------------------------------|-------------------------------------------------------------------------------------|-------------------------------------------------------------------------------------|-----------------------|--------------------|---------------------|
| Pt/C   | 4.0        | 44.8            | 7.1             | 3.4                           | 0.5                           | 16.4                                                                               | 24.6                                                                                | 3.0                                                                                 | -                     | -                  | 0.2                 |
| PtRe/C | 8.3        | 47.1            | 5.5             | 10.1                          | 3.2                           | 5.7                                                                                | 22.1                                                                                | 2.8                                                                                 | 2.3                   | 0.7                | 0.5                 |
| Rh/C   | 1.2        | 40.0            | 8.2             | 3.7                           | 0.4                           | 39.2                                                                               | 3.9                                                                                 | 0.9                                                                                 | 0.3                   | 0.4                | 3.0                 |
| RhRe/C | 10.8       | 42.1            | 7.1             | 11.0                          | 4.4                           | 8.6                                                                                | 21.6                                                                                | 2.7                                                                                 | 0.9                   | 0.4                | 1.2                 |
| Re/C   | 0.4        | 11.1            | -               | -                             | -                             | 79.6                                                                               | 9.3                                                                                 | -                                                                                   | -                     | -                  | -                   |

<sup>1</sup>alcohols: methanol, ethanol, 1-propanol, 2-propanol

<sup>2</sup>acids: acetic acid, propanoic acid

<sup>3</sup>others: CO, propionaldehyde, 1,3-propanediol

Table S4 – Product selectivities in APR of glycerol for Pt/C, PtRe/C, Rh/C, RhRe/C and Re/C catalysts after 200 min of reaction.

|        | Conversion | CO <sub>2</sub> | CH <sub>4</sub> | C <sub>2</sub> H <sub>6</sub> | C <sub>3</sub> H <sub>8</sub> | 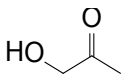 |  |  | Alcohols <sup>1</sup> | Acids <sup>2</sup> | others <sup>3</sup> |
|--------|------------|-----------------|-----------------|-------------------------------|-------------------------------|------------------------------------------------------------------------------------|-------------------------------------------------------------------------------------|-------------------------------------------------------------------------------------|-----------------------|--------------------|---------------------|
| Pt/C   | 6.6        | 46.7            | 8.3             | 4.2                           | 0.7                           | 14.0                                                                               | 23.1                                                                                | 1.7                                                                                 | 1.4                   | -                  | -                   |
| PtRe/C | 12.2       | 47.8            | 6.1             | 11.8                          | 4.1                           | 4.1                                                                                | 18.1                                                                                | 2.3                                                                                 | 4.3                   | 0.9                | 0.5                 |
| Rh/C   | 1.5        | 49.0            | 12.4            | 5.3                           | 0.5                           | 24.4                                                                               | 3.2                                                                                 | 0.7                                                                                 | 0.5                   | 0.4                | 3.6                 |
| RhRe/C | 15.9       | 43.5            | 8.2             | 14.0                          | 5.3                           | 7.0                                                                                | 17.5                                                                                | 1.9                                                                                 | 1.2                   | 0.7                | 0.7                 |
| Re/C   | 0.6        | 10.2            | -               | -                             | -                             | 78.3                                                                               | 11.5                                                                                | -                                                                                   | -                     | -                  | -                   |

<sup>1</sup>alcohols: methanol, ethanol, 1-propanol, 2-propanol

<sup>2</sup>acids: acetic acid, propanoic acid

<sup>3</sup>others: CO, propionaldehyde, 1,3-propanediol

Table S5 – Product selectivities in APR of glycerol for Pt/C, PtRe/C, Rh/C, RhRe/C and Re/C catalysts after 260 min of reaction.

| Conversion | CO <sub>2</sub> | CH <sub>4</sub> | C <sub>2</sub> H <sub>6</sub> | C <sub>3</sub> H <sub>8</sub> | 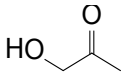 |  |  | Alcohols <sup>1</sup> | Acids <sup>2</sup> | others <sup>3</sup> |     |
|------------|-----------------|-----------------|-------------------------------|-------------------------------|------------------------------------------------------------------------------------|-------------------------------------------------------------------------------------|-------------------------------------------------------------------------------------|-----------------------|--------------------|---------------------|-----|
| Pt/C       | 8.5             | 47.2            | 9.2                           | 5.4                           | 0.8                                                                                | 11.1                                                                                | 23.1                                                                                | 1.8                   | 1.4                | -                   | -   |
| PtRe/C     | 16.4            | 49.3            | 6.8                           | 14.1                          | 5.3                                                                                | 2.7                                                                                 | 14.7                                                                                | 1.9                   | 4.0                | 0.8                 | 0.4 |
| Rh/C       | 1.6             | 51.8            | 13.7                          | 6.3                           | 0.5                                                                                | 20.5                                                                                | 3.1                                                                                 | 0.8                   | 0.2                | 0.3                 | 2.8 |
| RhRe/C     | 21.6            | 43.4            | 8.5                           | 15.8                          | 5.9                                                                                | 3.4                                                                                 | 18.9                                                                                | 2.3                   | 0.6                | 0.4                 | 0.8 |
| Re/C       | 0.7             | 11.2            | -                             | -                             | -                                                                                  | 71.5                                                                                | 17.4                                                                                | -                     | -                  | -                   | -   |

<sup>1</sup>alcohols: methanol, ethanol, 1-propanol, 2-propanol

<sup>2</sup>acids: acetic acid, propanoic acid

<sup>3</sup>others: CO, propionaldehyde, 1,3-propanediol

Table S6 – Product selectivities in APR of glycerol for Pt/C, PtRe/C, Rh/C, RhRe/C and Re/C catalysts after 320 min of reaction.

|        | Conversion | CO <sub>2</sub> | CH <sub>4</sub> | C <sub>2</sub> H <sub>6</sub> | C <sub>3</sub> H <sub>8</sub> | 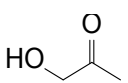 |  |  | Alcohols <sup>1</sup> | Acids <sup>2</sup> | others <sup>3</sup> |
|--------|------------|-----------------|-----------------|-------------------------------|-------------------------------|------------------------------------------------------------------------------------|-------------------------------------------------------------------------------------|-------------------------------------------------------------------------------------|-----------------------|--------------------|---------------------|
| Pt/C   | 9.0        | 47.7            | 9.3             | 6.2                           | 0.9                           | 8.9                                                                                | 23.5                                                                                | 1.7                                                                                 | 1.4                   | 0                  | 0.4                 |
| PtRe/C | 21.1       | 46.8            | 6.5             | 14.9                          | 6.1                           | 1.9                                                                                | 18.0                                                                                | 2.9                                                                                 | 1.4                   | 0.5                | 0.2                 |
| Rh/C   | 2.1        | 46.3            | 13.3            | 6.2                           | 0.4                           | 25.2                                                                               | 4.0                                                                                 | 0.7                                                                                 | 0.5                   | 0.4                | 3.0                 |
| RhRe/C | 24.0       | 44.2            | 8.6             | 17.3                          | 6.3                           | 2.7                                                                                | 17.0                                                                                | 2.0                                                                                 | 0.7                   | 0.4                | 0.8                 |
| Re/C   | 0.8        | 10.7            | -               | -                             | -                             | 75.3                                                                               | 14.0                                                                                | -                                                                                   | -                     | -                  | -                   |

<sup>1</sup>alcohols: methanol, ethanol, 1-propanol, 2-propanol

<sup>2</sup>acids: acetic acid, propanoic acid

<sup>3</sup>others: CO, propionaldehyde, 1,3-propanediol





Table S7 – Turnover frequencies calculated from reaction rates of glycerol APR, WGS and acetaldehyde decomposition over Pt/C, PtRe/C, Rh/C and RhRe/C taking into account metal dispersions estimated from TEM analysis. The promotional effects of Re on Pt and Rh for each of the reactions are determined by dividing the rates obtained with the bimetallic catalysts to those over their monometallic counterparts.

| Catalyst | APR<br>(mol glycerol<br>converted/mol <sub>Pt(Rh)</sub> .h) | WGS<br>(mol CO<br>converted/mol <sub>Pt(Rh)</sub> .h) | Acetaldehyde<br>decomposition<br>(mol CO<br>produced/mol <sub>Pt(Rh)</sub> .h) | Promotional effect of Re<br>(Rate <sub>Pt(Rh)Re</sub> /Rate <sub>Pt(Rh)</sub> ) |      |              |
|----------|-------------------------------------------------------------|-------------------------------------------------------|--------------------------------------------------------------------------------|---------------------------------------------------------------------------------|------|--------------|
|          |                                                             |                                                       |                                                                                | APR                                                                             | WGS  | Acetaldehyde |
| Pt/C     | 124                                                         | 1.5                                                   | 301                                                                            | 2.2                                                                             | 5.1  | 1.8          |
| PtRe/C   | 270                                                         | 7.5                                                   | 528                                                                            |                                                                                 |      |              |
| Rh/C     | 17                                                          | 0.9                                                   | 542                                                                            | 11.7                                                                            | 64.3 | 1.4          |
| RhRe/C   | 197                                                         | 58                                                    | 731                                                                            |                                                                                 |      |              |
